# Supplementary material for: Wind-driven stratification patterns and dissolved oxygen depletion off the Changjiang (Yangtze) Estuary
Source: Copernicus journal article supplement (doi:10.5194/bg-17-2875-2020), 2020-05-29
Supplement: Supplementary file 1 [file bg-17-2875-2020-supplement.zip]

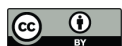

## *Supplement of*

# **Wind-driven stratification patterns and dissolved oxygen depletion off the Changjiang (Yangtze) Estuary**

**Taavi Liblik et al.**

*Correspondence to:* Daidu Fan (ddfan@tongji.edu.cn)

- [bg-17-2875-2020-supplement-title-page.pdf](#)
- [data\\_for\\_supplement.xls](#)

The copyright of individual parts of the supplement might differ from the CC BY 4.0 License.
