# Supplementary material for: Wind-driven stratification patterns and dissolved oxygen depletion off the Changjiang (Yangtze) Estuary
Source: Copernicus journal article supplement (doi:10.5194/bg-17-2875-2020), 2020-05-29
Supplement: Supplementary file 1 [file data_for_supplement.xls]

## Sheet: Surface_2015_08
Station	Year	Month	Day	Hour	Minute	Longitude (E)	Latitude (N)	DO (mg/l)	Temp. (°C)	Sal. (psu)	Chl a (μg/l)
A12-1	2015	8	27	11	17	122.382	29.2819	6.51759	26.1065	25.7709	1.17957
A12-2	2015	8	27	12	14	122.433	29.2653	6.63538	26.1288	25.6493	1.34815
A12-3	2015	8	27	13	50	122.56	29.2219	6.52411	26.1174	25.6521	1.14056
A12-4	2015	8	27	15	0	122.659	29.1978	6.74	26.0597	30.5195	2.849
A12-5	2015	8	28	5	59	122.927	29.1175	6.74947	27.4057	33.755	-
A10-6	2015	8	28	9	34	123.375	29.4903	6.64018	28.2357	33.7946	0.298077
A10-5	2015	8	28	11	29	123.102	29.5694	6.64025	28.2654	33.8796	0.198333
A10-4	2015	8	28	13	30	122.877	29.6431	6.64461	26.387	30.004	3.75947
A10-3	2015	8	28	16	26	122.74	29.6767	7.70686	26.5937	25.9159	10.9929
A10-2	2015	8	28	17	40	122.617	29.7231	7.12653	25.9008	25.311	8.989
A10-1	2015	8	28	18	34	122.516	29.7567	6.55368	25.8818	24.5174	6.61949
A9-3	2015	8	28	20	22	122.637	29.9406	7.07718	25.6032	24.8088	7.16571
A8-1	2015	8	29	5	0	122.513	30.2928	5.86643	25.3638	23.995	1.12538
A8-2	2015	8	29	6	55	122.69	30.2253	6.96053	25.6939	23.6167	4.55
A8-3	2015	8	29	8	17	122.841	30.155	5.57883	25.1933	25.3177	1.93786
A8-4	2015	8	29	9	40	123.026	30.1397	7.08031	25.792	27.0844	4.89529
A8-5	2015	8	29	12	11	123.233	30.05	7.56677	26.7915	31.4765	1.54429
A8-6	2015	8	29	13	58	123.495	29.9711	7.50832	27.482	33.1412	1.83043
A8-7	2015	8	29	15	49	123.751	29.9028	7.14134	27.594	33.068	2.11762
A8-8	2015	8	29	17	42	124.001	29.8181	6.5105	27.9193	33.8416	0.768095
A7-8	2015	8	29	19	44	124.025	30.1075	6.77968	27.7131	33.3009	1.9685
A7-7	2015	8	29	21	44	123.754	30.1689	7.12635	27.4002	32.9157	4.61667
A7-6	2015	8	30	5	30	123.506	30.2658	7.36101	26.3663	32.0349	7.62273
A7-5	2015	8	30	8	12	123.254	30.3583	6.88767	26.2891	32.7448	1.45263
A7-4	2015	8	30	10	0	123.006	30.4194	6.55605	26.029	31.7083	6.33095
A7-3	2015	8	30	12	20	122.792	30.4961	6.28508	26.6023	30.3331	10.5329
A7-2	2015	8	30	14	50	122.517	30.5672	6.10516	25.9539	26.5519	2.1319
A7-1	2015	8	30	17	22	122.25	30.6425	6.63136	26.4551	16.8863	13.2791
XQS	2015	8	30	18	34	122.251	30.545	6.48101	26.1915	19.1134	0.991176
A6-2	2015	8	31	13	8	122.249	30.9633	6.33503	26.6684	21.0523	2.6025
A6-3	2015	8	31	14	12	122.391	30.9189	7.0052	26.3087	23.4495	4.59706
A6-4	2015	8	31	15	4	122.483	30.8717	7.71307	26.3157	16.1751	4.32053
A6-5	2015	8	31	17	30	122.638	30.8406	7.60061	26.2743	26.8033	4.04842
A6-6	2015	8	31	19	8	122.832	30.7797	7.33989	25.9597	27.573	6.43
A6-7	2015	8	31	20	41	123.009	30.7147	6.6215	26.7512	27.8136	2.13294
A6-8	2015	8	31	22	47	123.248	30.6567	6.62184	27.1408	33.1634	1.73133
A6-9	2015	9	1	6	50	123.508	30.5731	6.30866	26.1958	32.1955	0.790714
A6-10	2015	9	1	9	0	123.777	30.5089	7.184	27.0957	32.5205	1.20059
A6-11	2015	9	1	11	14	123.992	30.4042	6.7096	27.5423	33.4298	0.378421
A4-10	2015	9	1	14	55	124.016	30.8567	6.83231	27.8095	33.5094	0.30875
A4-9	2015	9	1	17	0	123.77	30.9378	7.0718	27.7006	33.0747	1.186
A4-8	2015	9	1	18	55	123.519	30.985	6.74298	27.6424	30.8131	0.580476
A4-7	2015	9	1	20	46	123.275	31.0753	6.93797	27.6492	30.6517	1.06
A4-6	2015	9	1	23	0	122.891	31.1669	7.1636	26.8694	31.9551	2.98474
A4-5	2015	9	2	0	4	122.769	31.2203	7.02527	26.7169	29.3012	-
A4-4	2015	9	2	1	13	122.631	31.28	7.3564	26.0005	27.2112	-
A4-3	2015	9	2	2	23	122.543	31.3181	6.73776	26.4364	29.2818	-
A3-1	2015	9	2	9	42	122.238	31.6939	6.11272	26.2177	27.4812	1.149
A3-2	2015	9	2	10	51	122.321	31.6756	5.87302	25.5445	29.6772	1.7595
A3-3	2015	9	2	12	0	122.439	31.6422	4.82556	25.0123	30.4867	3.15211
A3-4	2015	9	2	14	17	122.643	31.5875	7.30457	26.1348	29.1934	10.8524
A3-5	2015	9	2	15	38	122.843	31.5519	5.04153	25.3912	32.6985	2.98111
A3-6	2015	9	2	16	55	123.019	31.4917	5.07558	26.19	32.5322	2.95952
A3-7	2015	9	2	18	2	123.211	31.4597	6.90182	26.671	32.0069	7.78588
A3-8	2015	9	2	19	47	123.491	31.3925	5.65963	25.3986	32.3591	6.49
A3-9	2015	9	2	21	33	123.737	31.3578	6.97351	26.5995	31.3781	3.26952
A1-9	2015	9	3	7	57	124.011	32.2572	4.47898	24.7336	30.3971	4.19125
A1-8	2015	9	3	9	21	123.757	32.255	4.57557	24.8852	30.5503	5.38722
A1-7	2015	9	3	10	48	123.485	32.2564	4.63795	24.5661	30.9247	0.67619
A1-6	2015	9	3	12	7	123.25	32.275	4.22961	25.1076	31.1208	0.689048
A1-5	2015	9	3	13	44	122.986	32.2564	4.28725	25.0071	31.528	0.8005
A1-4	2015	9	3	15	22	122.745	32.2625	4.37433	24.4215	31.9809	1.12143
A1-3	2015	9	3	17	5	122.539	32.2419	4.91317	25.1875	30.6793	2.51476
A2-2	2015	9	4	15	22	122.496	31.9228	4.27071	25.2335	30.9395	4.05105
A2-3	2015	9	4	16	49	122.711	31.8947	8.17555	26.6131	31.2765	2.01143
A2-4	2015	9	4	18	44	123.033	31.8606	5.04899	25.4109	32.4268	1.49952

## Sheet: Bottom_2015_08
Station	Year	Month	Day	Hour	Minute	Longitude (E)	Latitude (N)	DO (mg/l)	Temp. (°C)	Sal. (psu)
A12-1	2015	8	27	11	17	122.382	29.2819	5.6434	25.4541	30.6626
A12-2	2015	8	27	12	14	122.433	29.2653	5.09807	25.5227	32.7747
A12-3	2015	8	27	13	50	122.56	29.2219	2.36558	21.3326	34.1072
A12-4	2015	8	27	15	0	122.659	29.1978	2.56833	19.2678	34.1054
A12-5	2015	8	28	5	59	122.927	29.1175	3.79482	19.0236	34.4204
A10-6	2015	8	28	9	34	123.375	29.4903	4.11637	21.9299	34.2366
A10-5	2015	8	28	11	29	123.102	29.5694	3.07391	19.4256	34.3772
A10-4	2015	8	28	13	30	122.877	29.6431	2.95127	19.7976	34.319
A10-3	2015	8	28	16	26	122.74	29.6767	2.4404	20.0926	34.2917
A10-2	2015	8	28	17	40	122.617	29.7231	2.3232	21.0415	33.8607
A10-1	2015	8	28	18	34	122.516	29.7567	5.18126	24.5567	30.9859
A9-3	2015	8	28	20	22	122.637	29.9406	3.14389	22.193	33.3232
A8-1	2015	8	29	5	0	122.513	30.2928	5.5673	25.0191	25.4814
A8-2	2015	8	29	6	55	122.69	30.2253	4.23037	23.7357	31.4606
A8-3	2015	8	29	8	17	122.841	30.155	2.31035	21.1714	33.8038
A8-4	2015	8	29	9	40	123.026	30.1397	2.01127	20.3932	34.0766
A8-5	2015	8	29	12	11	123.233	30.05	2.83057	19.8621	34.3685
A8-6	2015	8	29	13	58	123.495	29.9711	3.17951	19.2414	34.3614
A8-7	2015	8	29	15	49	123.751	29.9028	3.64393	19.4407	33.4113
A8-8	2015	8	29	17	42	124.001	29.8181	3.93177	21.1454	34.308
A7-8	2015	8	29	19	44	124.025	30.1075	4.00152	21.5065	34.2848
A7-7	2015	8	29	21	44	123.754	30.1689	3.11852	19.876	34.3635
A7-6	2015	8	30	5	30	123.506	30.2658	2.60592	19.5104	34.3813
A7-5	2015	8	30	8	12	123.254	30.3583	2.70289	19.6256	34.3802
A7-4	2015	8	30	10	0	123.006	30.4194	2.17233	20.0719	34.2855
A7-3	2015	8	30	12	20	122.792	30.4961	2.72866	20.0739	34.2859
A7-2	2015	8	30	14	50	122.517	30.5672	5.17216	25.1115	29.9642
A7-1	2015	8	30	17	22	122.25	30.6425	6.65176	26.3	17.6459
XQS	2015	8	30	18	34	122.251	30.545	6.4954	26.1468	19.6931
A6-2	2015	8	31	13	8	122.249	30.9633	6.06908	26.2063	21.6347
A6-3	2015	8	31	14	12	122.391	30.9189	6.40578	26.0195	21.5928
A6-4	2015	8	31	15	4	122.483	30.8717	5.83895	25.3922	28.546
A6-5	2015	8	31	17	30	122.638	30.8406	5.52953	25.0743	30.1665
A6-6	2015	8	31	19	8	122.832	30.7797	5.12415	24.6867	30.9027
A6-7	2015	8	31	20	41	123.009	30.7147	2.52938	21.3201	34.1167
A6-8	2015	8	31	22	47	123.248	30.6567	2.27761	19.3356	34.355
A6-9	2015	9	1	6	50	123.508	30.5731	2.6035	19.7724	34.3803
A6-10	2015	9	1	9	0	123.777	30.5089	3.40615	20.24	34.3118
A6-11	2015	9	1	11	14	123.992	30.4042	3.88916	22.6981	34.179
A4-10	2015	9	1	14	55	124.016	30.8567	3.59324	22.4507	34.1895
A4-9	2015	9	1	17	0	123.77	30.9378	3.31832	22.0246	34.1638
A4-8	2015	9	1	18	55	123.519	30.985	3.00321	20.8972	34.2989
A4-7	2015	9	1	20	46	123.275	31.0753	2.65849	20.7436	34.2779
A4-6	2015	9	1	23	0	122.891	31.1669	2.85754	21.7118	34.1836
A4-5	2015	9	2	0	4	122.769	31.2203	2.96488	23.0435	33.873
A4-4	2015	9	2	1	13	122.631	31.28	2.92777	23.4798	33.4815
A4-3	2015	9	2	2	23	122.543	31.3181	3.91131	24.4119	33.0085
A3-1	2015	9	2	9	42	122.238	31.6939	5.82049	25.9846	28.4478
A3-2	2015	9	2	10	51	122.321	31.6756	5.13971	25.1187	30.4246
A3-3	2015	9	2	12	0	122.439	31.6422	4.01416	24.4321	31.3248
A3-4	2015	9	2	14	17	122.643	31.5875	4.55639	24.9669	33.0031
A3-5	2015	9	2	15	38	122.843	31.5519	4.48881	24.7797	33.1091
A3-6	2015	9	2	16	55	123.019	31.4917	4.39733	24.5318	33.0168
A3-7	2015	9	2	18	2	123.211	31.4597	4.17903	24.6067	32.7787
A3-8	2015	9	2	19	47	123.491	31.3925	3.95293	24.2584	32.7597
A3-9	2015	9	2	21	33	123.737	31.3578	3.65542	23.8752	32.7738
A1-9	2015	9	3	7	57	124.011	32.2572	3.58666	23.677	30.746
A1-8	2015	9	3	9	21	123.757	32.255	3.5012	24.0711	30.7872
A1-7	2015	9	3	10	48	123.485	32.2564	3.81444	24.3684	30.9315
A1-6	2015	9	3	12	7	123.25	32.275	3.94736	24.5445	31.1316
A1-5	2015	9	3	13	44	122.986	32.2564	3.97276	24.4934	31.5758
A1-4	2015	9	3	15	22	122.745	32.2625	4.11475	24.3228	31.967
A1-3	2015	9	3	17	5	122.539	32.2419	4.40722	24.8749	30.73
A2-2	2015	9	4	15	22	122.496	31.9228	3.92961	24.4867	31.3467
A2-3	2015	9	4	16	49	122.711	31.8947	3.73487	24.1906	32.0968
A2-4	2015	9	4	18	44	123.033	31.8606	4.7099	25.2416	32.4385

## Sheet: Surface_2017_07
Station	Year	Month	Day	Hour	Minute	Longitude (E)	Latitude (N)	DO (mg/l)	Temp. (°C)	Sal. (psu)
YES2-1	2017	7	24	9	40	122.382	29.2991	6.15819	25.4618	31.2357
YES2-2	2017	7	24	10	6	122.442	29.2753	7.99058	26.4732	31.3778
YES2-3	2017	7	24	11	7	122.532	29.2323	8.29532	26.9384	31.5679
YES2-4	2017	7	24	12	13	122.651	29.1845	6.7504	27.55	33.2821
YES2-5	2017	7	24	13	56	122.905	29.1215	6.63247	29.4762	33.8791
YES2-6	2017	7	24	15	44	123.152	29.0358	6.35972	29.415	33.6343
YES2-7	2017	7	24	18	8	123.5	29.0335	6.69142	29.867	33.81
YES2-8	2017	7	24	20	55	123.905	29.038	6.01969	29.6502	33.7443
YES2-9	2017	7	25	0	28	124.503	29.0363	6.22872	29.4633	33.573
YE-20	2017	7	25	3	20	124.94	29.1065	6.15171	30.0486	32.9244
YE-19	2017	7	25	7	18	124.506	29.5056	6.48476	29.5169	33.6261
YE-18	2017	7	25	11	26	124.009	30.0088	6.95108	29.479	33.1381
YE-17	2017	7	25	16	0	123.506	30.4893	7.07837	29.8032	31.2765
YE-16-1	2017	7	25	18	23	123.25	30.6504	6.7732	28.3164	32.5602
YE-15	2017	7	26	8	45	122.998	30.7151	5.59879	24.9008	30.453
YE-14	2017	7	26	9	54	122.837	30.7536	3.50307	23.6228	28.1599
YE-13	2017	7	26	11	46	122.637	30.8532	6.58853	27.6656	21.1574
YE-12-1	2017	7	26	12	50	122.5	30.8667	4.64229	24.4561	26.3075
YE-11	2017	7	27	5	58	122.398	30.9147	4.55182	26.3802	20.4565
YE-10	2017	7	27	7	36	122.229	30.9622	4.37276	27.7563	14.0465
YE-9	2017	7	27	8	21	122.149	31.032	4.36692	28.4612	11.4323
YE-8	2017	7	27	10	9	121.923	31.14	3.49635	30.6657	0.195747
YE-7	2017	7	27	11	7	121.804	31.2207	4.02156	30.3719	0.253199
YE-5	2017	7	27	12	46	121.562	31.4119	4.72743	30.3581	0.12235
YE-4	2017	7	27	13	35	121.431	31.5138	4.91938	30.3644	0.11898
YE-2	2017	7	27	15	8	121.205	31.6719	5.12812	31.094	0.121238
YE-1	2017	7	27	15	41	121.121	31.7376	4.69309	30.0629	0.119553
YEN-1-4	2017	7	27	21	0	121.449	31.5327	4.9514	30.2069	0.119915
YEN1-2	2017	7	28	5	14	121.499	31.5156	3.006	30.0996	0.12038
YEN1-3	2017	7	28	5	59	121.634	31.4836	3.36549	30.3099	0.0766743
YEN1-4	2017	7	28	6	55	121.801	31.3841	3.51598	30.1764	0.1201
YEN1-5	2017	7	28	7	31	121.919	31.3527	3.19103	30.1833	0.121766
YEN1-6	2017	7	28	8	6	122.018	31.3344	4.56398	30.1434	0.117429
YEN1-7	2017	7	28	8	59	122.214	31.3475	5.13317	29.3385	5.75734
YEN1-8	2017	7	28	11	1	122.502	31.5019	6.61774	28.8675	23.4303
YEN1-9	2017	7	28	12	20	122.655	31.5881	5.48174	24.5654	29.4223
YEN1-10	2017	7	28	13	39	122.745	31.7453	2.18669	21.2962	32.9999
YEN1-11-2	2017	7	28	15	50	122.999	31.9988	5.25195	24.0036	14.8969
YEN1-12	2017	7	28	17	21	123.249	31.9991	7.52568	29.533	21.2017
YEN1-13	2017	7	28	18	54	123.5	31.9834	7.30976	30.4808	22.7818
YEC-2	2017	7	28	20	35	123.492	31.7423	7.43427	26.348	27.1159
YEC-3	2017	7	28	22	7	123.375	31.5084	5.08332	25.6234	29.7987
YEC-4	2017	7	29	0	6	123.199	31.249	7.19892	29.5874	27.6259
YEC-5	2017	7	29	1	58	123.012	31.0287	5.21497	27.548	28.9764
YE-14-2	2017	7	29	4	4	122.853	30.7859	3.27746	24.2848	27.1904
YEC-6	2017	7	29	6	35	122.754	30.5044	5.91746	25.0473	27.6746
YEC-7	2017	7	29	8	6	122.752	30.2522	5.29758	24.6936	28.2418
YEC-8	2017	7	29	9	30	122.731	30.0143	5.94488	25.6344	28.7198
YEC-9	2017	7	29	11	10	122.681	29.764	7.05108	25.2182	29.7673
YEC-10	2017	7	29	12	11	122.61	29.5936	7.04115	26.1653	29.305

## Sheet: Bottom_2017_07
Station	Year	Month	Day	Hour	Minute	Longitude (E)	Latitude (N)	DO (mg/l)	Temp. (°C)	Sal. (psu)
YES2-1	2017	7	24	9	40	122.382	29.2991	2.42946	19.9108	33.6981
YES2-2	2017	7	24	10	6	122.442	29.2753	2.81863	19.7555	34.2306
YES2-3	2017	7	24	11	7	122.532	29.2323	4.62441	19.639	34.2786
YES2-4	2017	7	24	12	13	122.651	29.1845	4.79965	18.9863	34.2944
YES2-5	2017	7	24	13	56	122.905	29.1215	5.04373	19.4034	34.3197
YES2-6	2017	7	24	15	44	123.152	29.0358	4.97907	20.1498	34.3311
YES2-7	2017	7	24	18	8	123.5	29.0335	4.93969	21.884	34.3394
YES2-8	2017	7	24	20	55	123.905	29.038	4.93581	23.3791	34.3199
YES2-9	2017	7	25	0	28	124.503	29.0363	4.70608	21.9485	34.4832
YE-20	2017	7	25	3	20	124.94	29.1065	4.72831	19.8877	34.53
YE-19	2017	7	25	7	18	124.506	29.5056	4.95897	22.8461	34.4703
YE-18	2017	7	25	11	26	124.009	30.0088	4.59159	23.1008	34.453
YE-17	2017	7	25	16	0	123.506	30.4893	4.33408	20.3103	34.4879
YE-16-1	2017	7	25	18	23	123.25	30.6504	4.07157	20.7091	34.504
YE-15	2017	7	26	8	45	122.998	30.7151	3.4433	19.9675	34.409
YE-14	2017	7	26	9	54	122.837	30.7536	2.82032	20.951	33.6473
YE-13	2017	7	26	11	46	122.637	30.8532	3.41196	21.4777	32.0456
YE-12-1	2017	7	26	12	50	122.5	30.8667	3.73452	22.3288	30.5888
YE-11	2017	7	27	5	58	122.398	30.9147	3.88438	25.7139	21.7532
YE-10	2017	7	27	7	36	122.229	30.9622	3.58673	27.7062	14.5524
YE-9	2017	7	27	8	21	122.149	31.032	3.82676	28.303	11.6639
YE-8	2017	7	27	10	9	121.923	31.14	4.07152	30.6549	0.185512
YE-7	2017	7	27	11	7	121.804	31.2207	3.51196	30.3697	0.265735
YE-5	2017	7	27	12	46	121.562	31.4119	4.99483	30.4894	0.122062
YE-4	2017	7	27	13	35	121.431	31.5138	4.32603	30.1322	0.119778
YE-2	2017	7	27	15	8	121.205	31.6719	4.20979	30.0628	0.119531
YE-1	2017	7	27	15	41	121.121	31.7376	4.86817	30.1265	0.119451
YEN-1-4	2017	7	27	21	0	121.449	31.5327	3.75254	30.2104	0.1198
YEN1-2	2017	7	28	5	14	121.499	31.5156	4.29864	30.0456	0.118618
YEN1-3	2017	7	28	5	59	121.634	31.4836	3.5196	30.3107	0.125494
YEN1-4	2017	7	28	6	55	121.801	31.3841	3.7541	30.2025	0.120059
YEN1-5	2017	7	28	7	31	121.919	31.3527	3.30188	30.191	0.119414
YEN1-6	2017	7	28	8	6	122.018	31.3344	3.56667	30.2137	0.12071
YEN1-7	2017	7	28	8	59	122.214	31.3475	4.36045	29.3351	6.25388
YEN1-8	2017	7	28	11	1	122.502	31.5019	2.00725	21.6448	33.4912
YEN1-9	2017	7	28	12	20	122.655	31.5881	1.67174	21.4322	33.3997
YEN1-10	2017	7	28	13	39	122.745	31.7453	0.86208	20.718	33.5264
YEN1-11-2	2017	7	28	15	50	122.999	31.9988	0.617748	21.725	32.6782
YEN1-12	2017	7	28	17	21	123.249	31.9991	0.690157	21.7459	32.8965
YEN1-13	2017	7	28	18	54	123.5	31.9834	1.48274	22.2641	32.643
YEC-2	2017	7	28	20	35	123.492	31.7423	2.74136	22.341	32.7899
YEC-3	2017	7	28	22	7	123.375	31.5084	2.33267	21.621	32.6897
YEC-4	2017	7	29	0	6	123.199	31.249	3.68181	21.1918	34.4321
YEC-5	2017	7	29	1	58	123.012	31.0287	2.10845	20.5543	34.3959
YE-14-2	2017	7	29	4	4	122.853	30.7859	2.53594	20.925	34.0908
YEC-6	2017	7	29	6	35	122.754	30.5044	2.96816	19.7425	34.0897
YEC-7	2017	7	29	8	6	122.752	30.2522	3.68938	21.4443	31.7343
YEC-8	2017	7	29	9	30	122.731	30.0143	3.16352	19.622	33.8289
YEC-9	2017	7	29	11	10	122.681	29.764	2.96787	18.9133	34.3209
YEC-10	2017	7	29	12	11	122.61	29.5936	2.81182	19.4226	34.0578
